# Supplementary material for: Unveiling growth mechanisms of PEALD In2O3 thin films with amide-based versus alkyl-based novel indium precursors
Source: Royal Society of Chemistry journal article supplement (doi:10.1039/d4tc00868e), 2024-01-01
Supplement: d4tc00868e1.pdf [file d4tc00868e1.pdf]

Supporting data

# Unveiling Growth Mechanisms of PEALD In<sub>2</sub>O<sub>3</sub> Thin Films with Amide-Based Versus Alkyl- Based Novel Indium Precursors

*Gyeong Min Jeong<sup>a</sup>, Yoon-Seo Kim<sup>a</sup>, Hae Lin Yang<sup>a</sup>, Ara Yoon<sup>a</sup>, Sangick Lee<sup>b</sup>, Yonghee Kwone<sup>b</sup>, Sangyong Jeon<sup>b</sup>, Youngjae Im<sup>b</sup>, and Jin-Seong Park<sup>a\*</sup>*

<sup>a</sup>Division of Materials Science and Engineering, Hanyang University, 222, Wangsimni-ro, Seongdong-gu, Seoul, Republic of Korea

<sup>b</sup>R&D Center, DNF, 142 Daehwa-ro, 132 Beon-gil, Daedeok-gu, Daejeon 34366, Republic of Korea

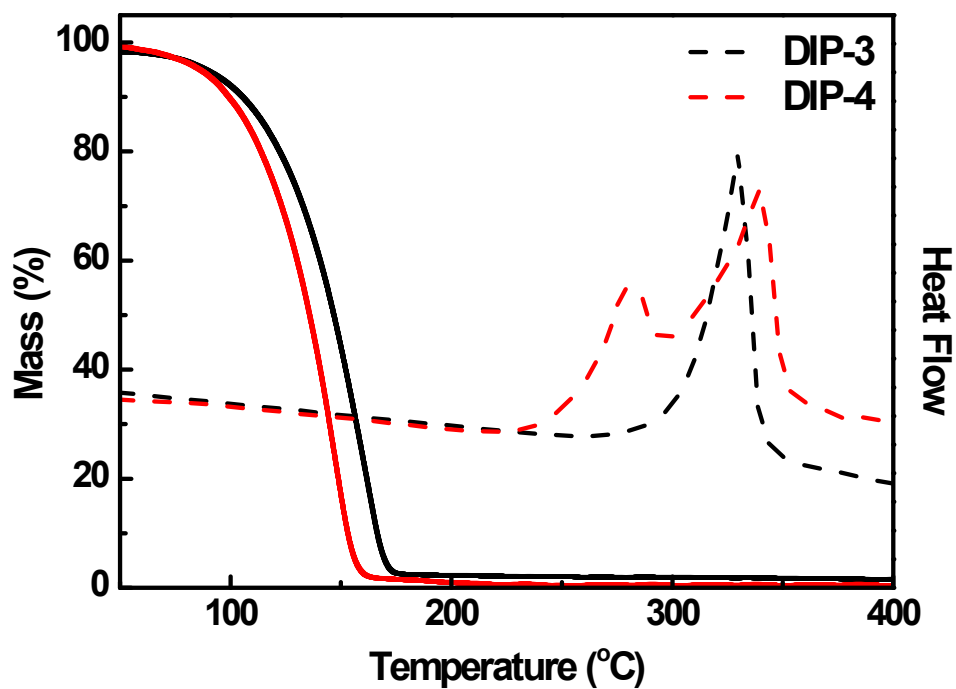

**Figure S1.** thermogravimetric analysis (TGA, solid line) and differential scanning calorimetry (DSC, dashed line) of the two precursors. These precursors are almost vaporized at 150°C. DIP-3 (black) shows one heat flow on 320°C, but DIP-4 (Red) shows two heat flow point at 250°C and 330°C.

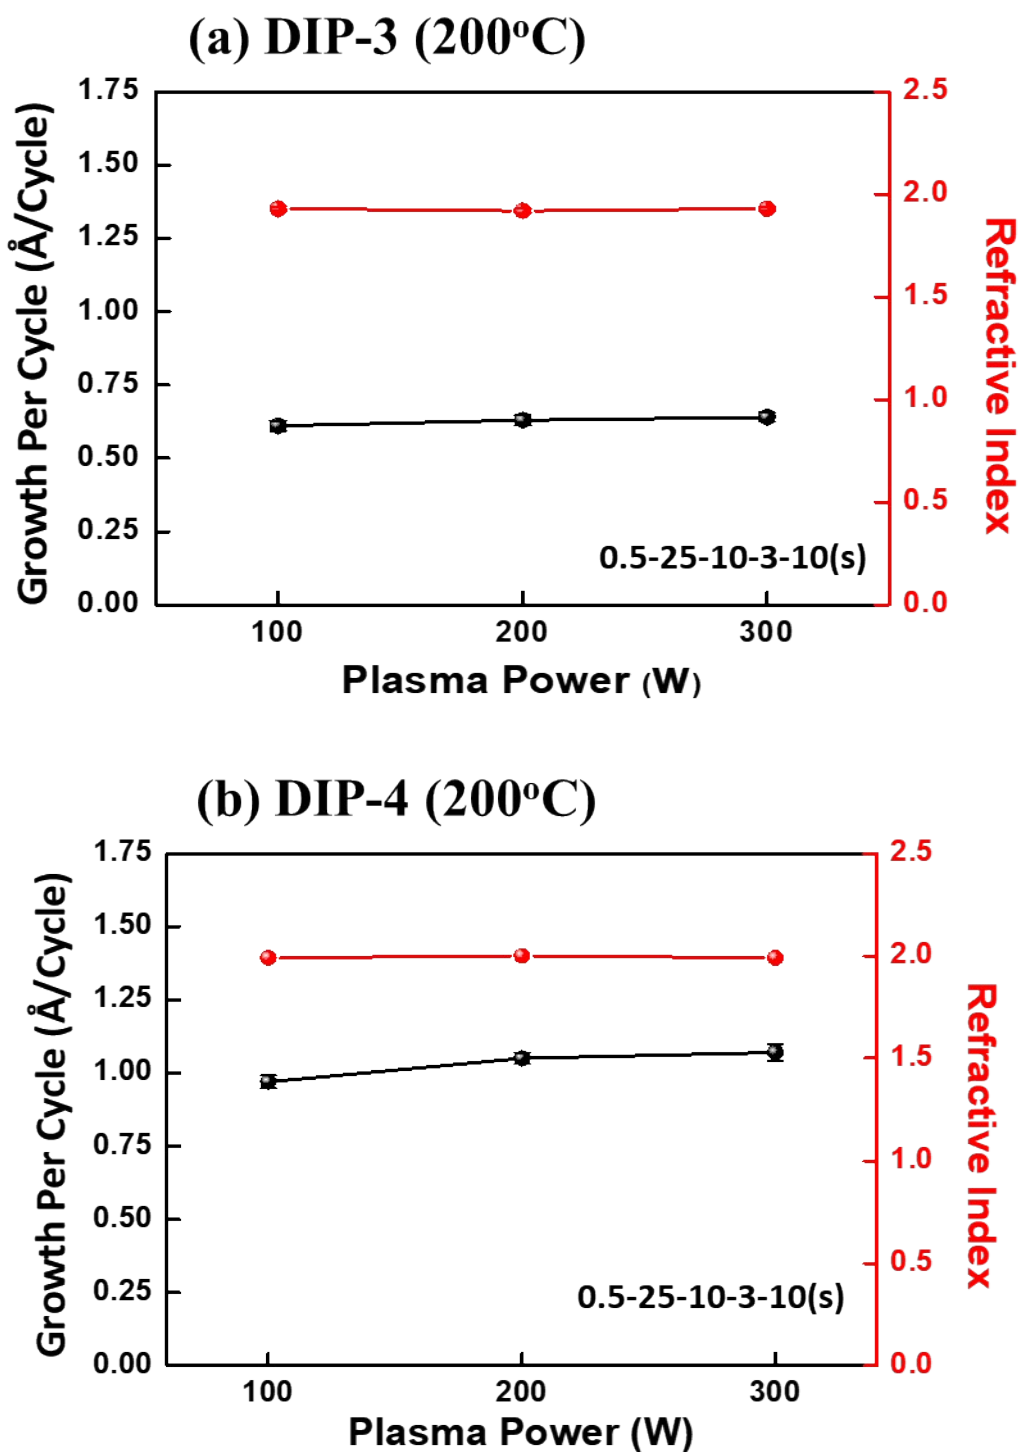

**Figure S2.** ALD process optimizing of In<sub>2</sub>O<sub>3</sub> PEALD using DIP-3 and DIP-4. (a) plasma time for DIP-3, (b) plasma power for DIP-3, (c) plasma time for DIP-4, (d) plasma power for DIP-4

**(a) DIP-3**

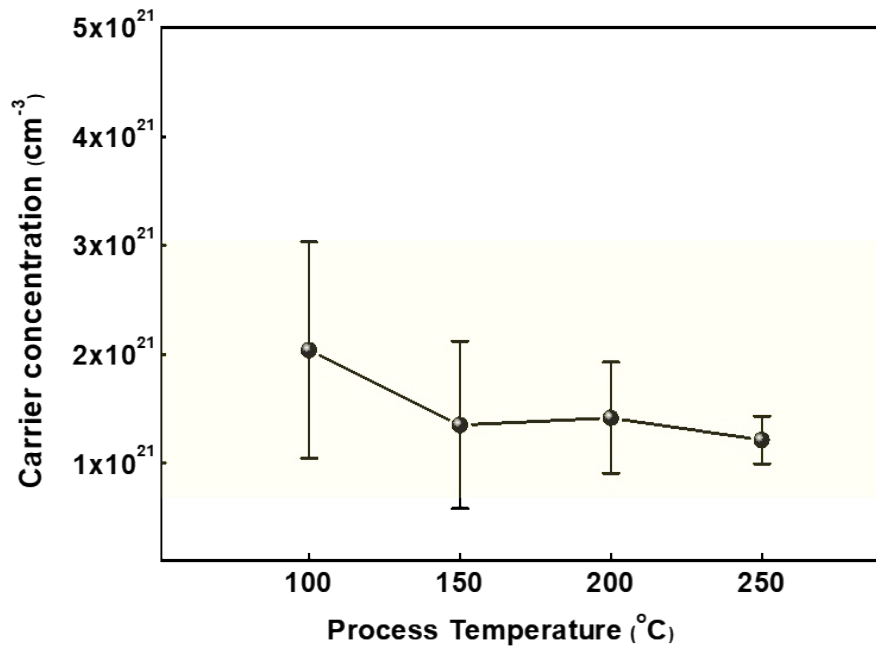

**(b) DIP-4**

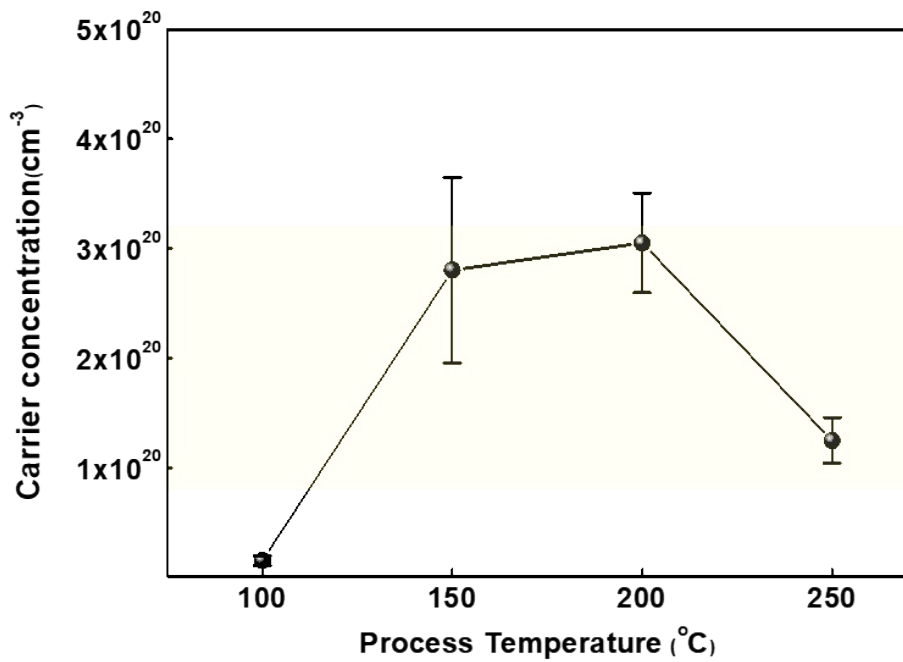

**Figure S3.** Carrier concentration variation in the Hall measurement result. (a) DIP-3 (range:  $1 \times 10^{20} \sim 5 \times 10^{21}$ ) (b) DIP-4 (range:  $1 \times 10^{19} \sim 5 \times 10^{20}$ )
